# Supplementary material
Source: MDPI journal article supplement (https://www.mdpi.com/2304-6740/7/11/132)

# checkCIF/PLATON report

Structure factors have been supplied for datablock(s) 2LiCl

THIS REPORT IS FOR GUIDANCE ONLY. IF USED AS PART OF A REVIEW PROCEDURE FOR PUBLICATION, IT SHOULD NOT REPLACE THE EXPERTISE OF AN EXPERIENCED CRYSTALLOGRAPHIC REFEREE.

No syntax errors found.      CIF dictionary      Interpreting this report

## Datablock: 2LiCl

---

|                 |                                        |                                        |
|-----------------|----------------------------------------|----------------------------------------|
| Bond precision: | C-C = 0.0079 A                         | Wavelength=0.71073                     |
| Cell:           | a=27.6951(9)                           | b=9.7813(3)      c=14.2023(5)          |
|                 | alpha=90                               | beta=103.951(3)      gamma=90          |
| Temperature:    | 103 K                                  |                                        |
|                 | Calculated                             | Reported                               |
| Volume          | 3733.8(2)                              | 3733.8(2)                              |
| Space group     | P 21/c                                 | P 21/c                                 |
| Hall group      | -P 2ybc                                | -P 2ybc                                |
| Moiety formula  | 2(C30 H22 Al Cl F10 Li P), 4(C3.50 H4) | 2(C30 H22 Al Cl F10 Li P), 4(C3.50 H4) |
| Sum formula     | C81 H68 Al2 Cl2 F20 Li2 P2             | C40.50 H34 Al Cl F10 Li P              |
| Mr              | 1622.03                                | 811.01                                 |
| Dx,g cm-3       | 1.443                                  | 1.443                                  |
| Z               | 2                                      | 4                                      |
| Mu (mm-1)       | 0.249                                  | 0.249                                  |
| F000            | 1660.0                                 | 1660.0                                 |
| F000'           | 1662.29                                |                                        |
| h,k,lmax        | 33,11,17                               | 33,11,16                               |
| Nref            | 6758                                   | 6745                                   |
| Tmin,Tmax       | 0.985,0.993                            | 0.677,1.000                            |
| Tmin'           | 0.983                                  |                                        |

Correction method= # Reported T Limits: Tmin=0.677 Tmax=1.000  
AbsCorr = MULTI-SCAN

Data completeness= 0.998      Theta(max)= 25.250

R(reflections)= 0.0841( 5830)      wR2(reflections)= 0.2188( 6745)

S = 1.155      Npar= 531

---

The following ALERTS were generated. Each ALERT has the format

**test-name\_ALERT\_alert-type\_alert-level.**

Click on the hyperlinks for more details of the test.

---

### ● Alert level C

|                   |                                                  |         |        |
|-------------------|--------------------------------------------------|---------|--------|
| PLAT094_ALERT_2_C | Ratio of Maximum / Minimum Residual Density .... | 2.58    | Report |
| PLAT250_ALERT_2_C | Large U3/U1 Ratio for Average U(i,j) Tensor .... | 2.7     | Note   |
| PLAT334_ALERT_2_C | Small Aver. Benzene C-C Dist C18 -C23            | 1.37    | Ang.   |
| PLAT334_ALERT_2_C | Small Aver. Benzene C-C Dist C24 -C29            | 1.37    | Ang.   |
| PLAT340_ALERT_3_C | Low Bond Precision on C-C Bonds .....            | 0.00792 | Ang.   |
| PLAT906_ALERT_3_C | Large K Value in the Analysis of Variance .....  | 9.541   | Check  |
| PLAT906_ALERT_3_C | Large K Value in the Analysis of Variance .....  | 2.405   | Check  |
| PLAT911_ALERT_3_C | Missing FCF Refl Between Thmin & STh/L= 0.600    | 11      | Report |
| PLAT978_ALERT_2_C | Number C-C Bonds with Positive Residual Density. | 0       | Info   |

---

### ● Alert level G

FORMU01\_ALERT\_1\_G There is a discrepancy between the atom counts in the  
\_chemical\_formula\_sum and \_chemical\_formula\_moiety. This is  
usually due to the moiety formula being in the wrong format.  
Atom count from \_chemical\_formula\_sum: C40.5 H34 Al1 Cl1 F10 Li1 P1  
Atom count from \_chemical\_formula\_moiety: C74 H60 Al2 Cl2 F20 Li2 P2

|                   |                                                  |       |             |
|-------------------|--------------------------------------------------|-------|-------------|
| PLAT004_ALERT_5_G | Polymeric Structure Found with Maximum Dimension | 1     | Info        |
| PLAT045_ALERT_1_G | Calculated and Reported Z Differ by a Factor ... | 0.50  | Check       |
| PLAT083_ALERT_2_G | SHELXL Second Parameter in WGHT Unusually Large  | 16.39 | Why ?       |
| PLAT300_ALERT_4_G | Atom Site Occupancy of C37 Constrained at        | 0.5   | Check       |
| PLAT300_ALERT_4_G | Atom Site Occupancy of C38 Constrained at        | 0.5   | Check       |
| PLAT300_ALERT_4_G | Atom Site Occupancy of C39 Constrained at        | 0.5   | Check       |
| PLAT300_ALERT_4_G | Atom Site Occupancy of C40 Constrained at        | 0.5   | Check       |
| PLAT300_ALERT_4_G | Atom Site Occupancy of C41 Constrained at        | 0.5   | Check       |
| PLAT300_ALERT_4_G | Atom Site Occupancy of C42 Constrained at        | 0.5   | Check       |
| PLAT300_ALERT_4_G | Atom Site Occupancy of C43 Constrained at        | 0.5   | Check       |
| PLAT300_ALERT_4_G | Atom Site Occupancy of H38 Constrained at        | 0.5   | Check       |
| PLAT300_ALERT_4_G | Atom Site Occupancy of H39 Constrained at        | 0.5   | Check       |
| PLAT300_ALERT_4_G | Atom Site Occupancy of H40 Constrained at        | 0.5   | Check       |
| PLAT300_ALERT_4_G | Atom Site Occupancy of H41 Constrained at        | 0.5   | Check       |
| PLAT300_ALERT_4_G | Atom Site Occupancy of H42 Constrained at        | 0.5   | Check       |
| PLAT300_ALERT_4_G | Atom Site Occupancy of H43 Constrained at        | 0.5   | Check       |
| PLAT300_ALERT_4_G | Atom Site Occupancy of H43A Constrained at       | 0.5   | Check       |
| PLAT300_ALERT_4_G | Atom Site Occupancy of H43B Constrained at       | 0.5   | Check       |
| PLAT302_ALERT_4_G | Anion/Solvent/Minor-Residue Disorder (Resd 3 )   | 100%  | Note        |
| PLAT789_ALERT_4_G | Atoms with Negative _atom_site_disorder_group #  | 15    | Check       |
| PLAT883_ALERT_1_G | No Info/Value for _atom_sites_solution_primary . |       | Please Do ! |
| PLAT898_ALERT_4_G | Second Reported H-M Symbol in CIF Ignored .....  |       | ! Check     |
| PLAT909_ALERT_3_G | Percentage of I>2sig(I) Data at Theta(Max) Still | 70%   | Note        |
| PLAT910_ALERT_3_G | Missing # of FCF Reflection(s) Below Theta(Min). | 2     | Note        |

---

0 **ALERT level A** = Most likely a serious problem - resolve or explain

0 **ALERT level B** = A potentially serious problem, consider carefully

9 **ALERT level C** = Check. Ensure it is not caused by an omission or oversight

25 **ALERT level G** = General information/check it is not something unexpected

3 ALERT type 1 CIF construction/syntax error, inconsistent or missing data

6 ALERT type 2 Indicator that the structure model may be wrong or deficient

6 ALERT type 3 Indicator that the structure quality may be low

18 ALERT type 4 Improvement, methodology, query or suggestion

1 ALERT type 5 Informative message, check

---

It is advisable to attempt to resolve as many as possible of the alerts in all categories. Often the minor alerts point to easily fixed oversights, errors and omissions in your CIF or refinement strategy, so attention to these fine details can be worthwhile. In order to resolve some of the more serious problems it may be necessary to carry out additional measurements or structure refinements. However, the purpose of your study may justify the reported deviations and the more serious of these should normally be commented upon in the discussion or experimental section of a paper or in the "special\_details" fields of the CIF. checkCIF was carefully designed to identify outliers and unusual parameters, but every test has its limitations and alerts that are not important in a particular case may appear. Conversely, the absence of alerts does not guarantee there are no aspects of the results needing attention. It is up to the individual to critically assess their own results and, if necessary, seek expert advice.

### **Publication of your CIF in IUCr journals**

A basic structural check has been run on your CIF. These basic checks will be run on all CIFs submitted for publication in IUCr journals (*Acta Crystallographica*, *Journal of Applied Crystallography*, *Journal of Synchrotron Radiation*); however, if you intend to submit to *Acta Crystallographica Section C* or *E* or *IUCrData*, you should make sure that full publication checks are run on the final version of your CIF prior to submission.

### **Publication of your CIF in other journals**

Please refer to the *Notes for Authors* of the relevant journal for any special instructions relating to CIF submission.

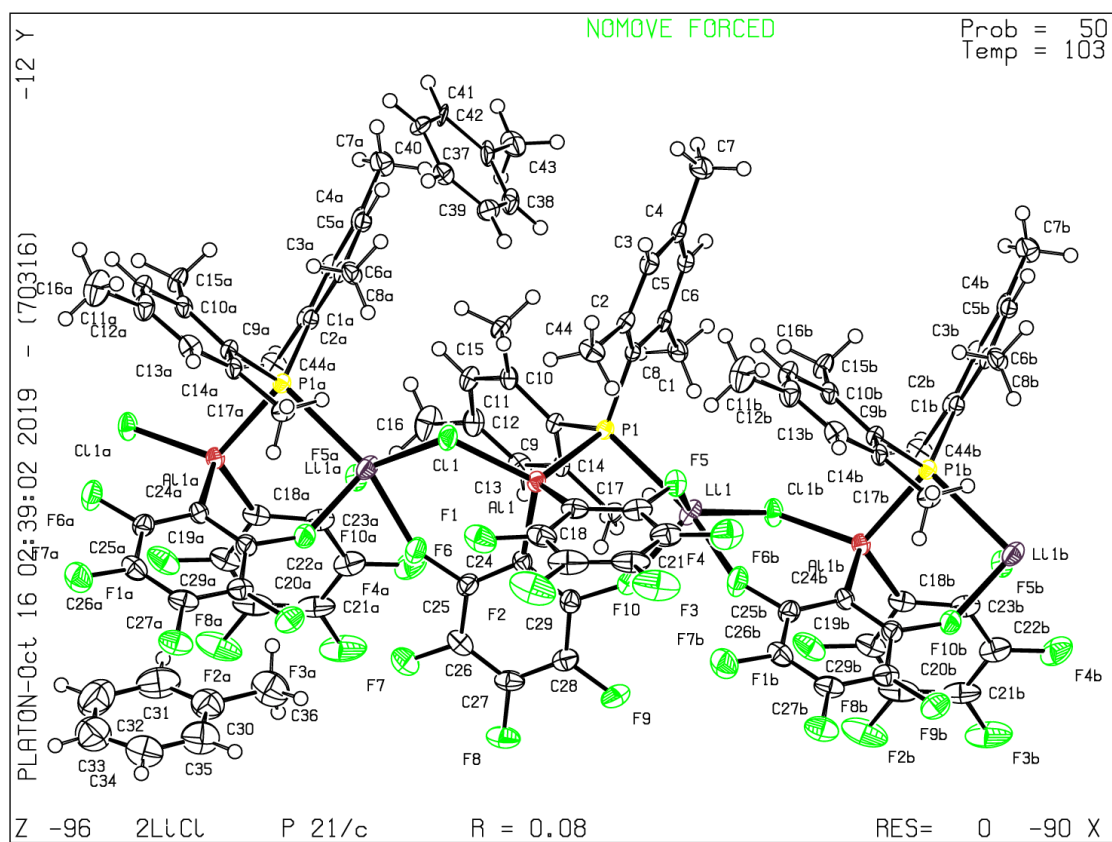

Supplement: s1 [file s1]
