# Supplementary material
Source: MDPI journal article supplement (https://www.mdpi.com/2304-6740/7/11/132)
Supplement: s1 [file s1]

# **Supplementary Materials: Syntheses and Structures of Novel $\lambda^3, \lambda^3$ -Phosphanylalumanes Fully Bearing Carbon Substituents and Their Substituent Effects**

Tatsuya Yanagisawa, Yoshiyuki Mizuhata and Norihiro Tokitoh

## **Contents**

- 1. Spectroscopic Data S2**
- 2. X-Ray Crystallographic Analysis S11**
- 3. Computational Studies S13**

## 1. Spectroscopic Data

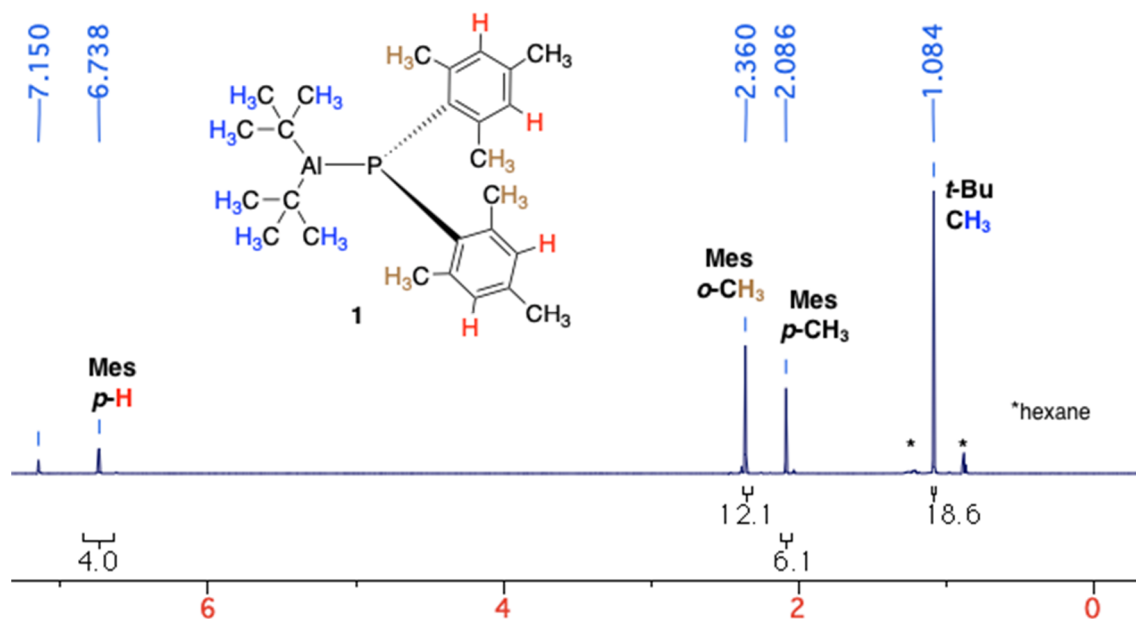Figure S1.  $^1\text{H}$  NMR spectrum of **1** (600 MHz,  $\text{C}_6\text{D}_6$ , 298 K).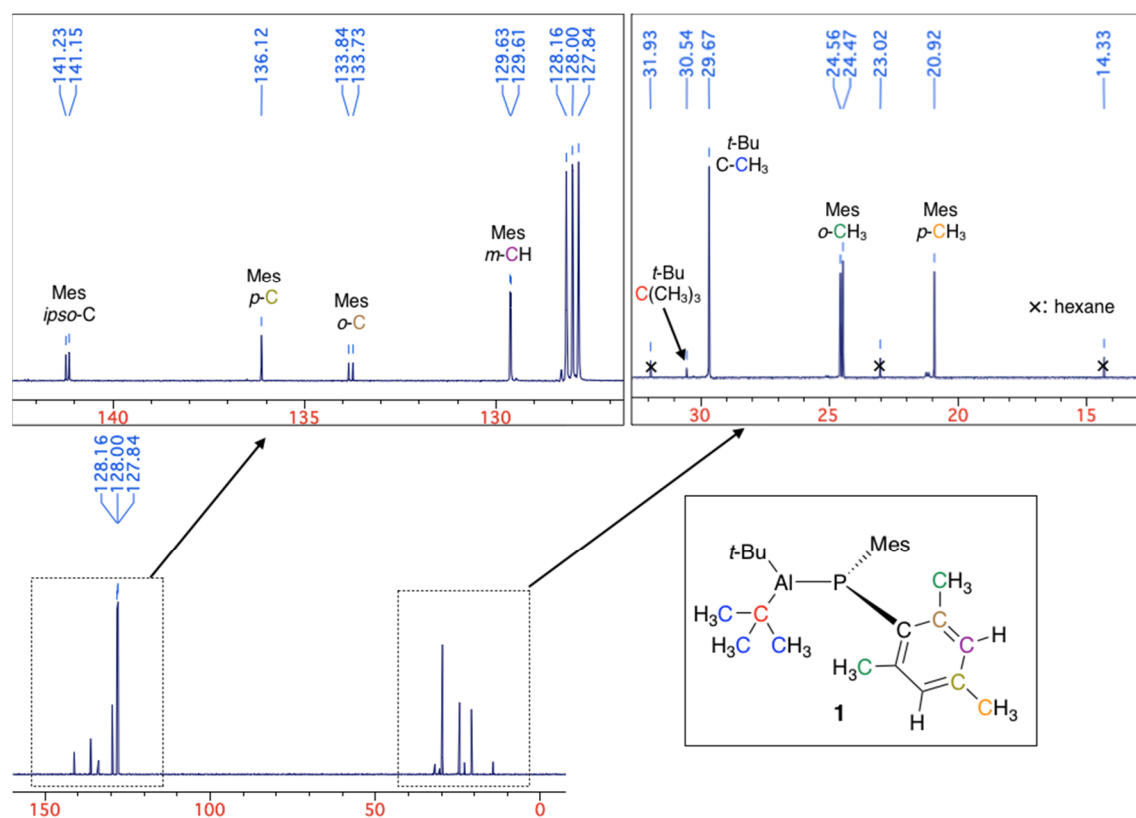Figure S2.  $^{13}\text{C}\{^1\text{H}\}$  NMR spectrum of **1** (151 MHz,  $\text{C}_6\text{D}_6$ , 298 K).

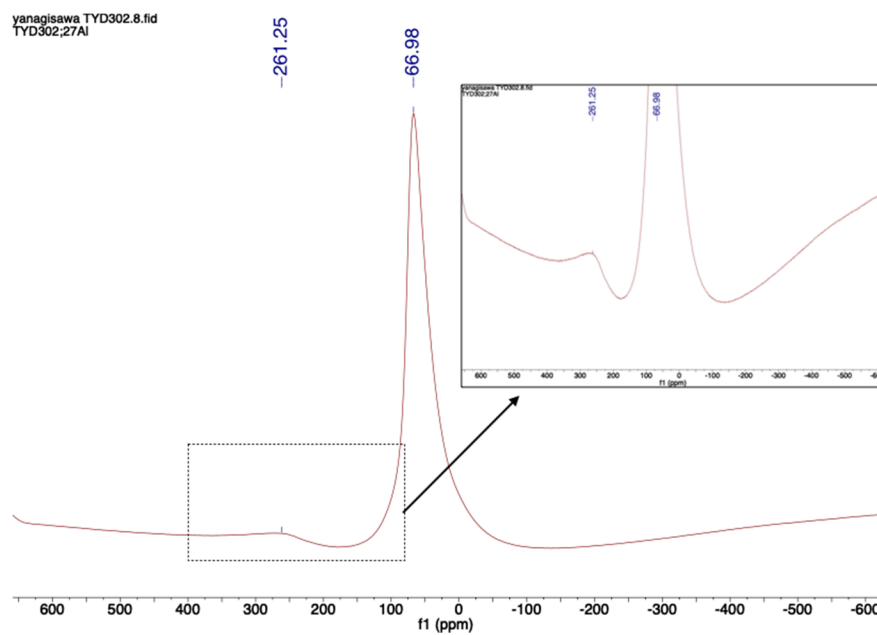

**Figure S3.**  $^{27}\text{Al}\{^1\text{H}\}$  NMR spectrum of **1** (156 MHz,  $\text{C}_6\text{D}_6$ , 298 K).

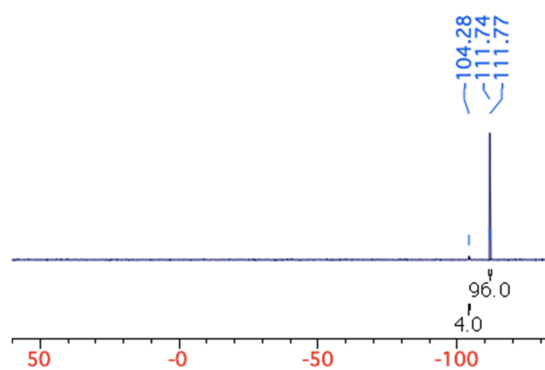

**Figure S4.**  $^{31}\text{P}\{^1\text{H}\}$  NMR spectrum of **1** (242 MHz,  $\text{C}_6\text{D}_6$ , 298 K).

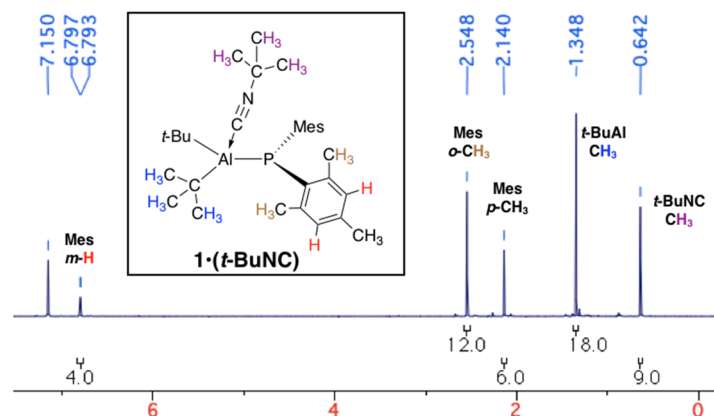

Figure S5.  $^1\text{H}$  NMR spectrum of  $1\text{-(t-BuNC)}$  (600 MHz,  $\text{C}_6\text{D}_6$ , 298 K).

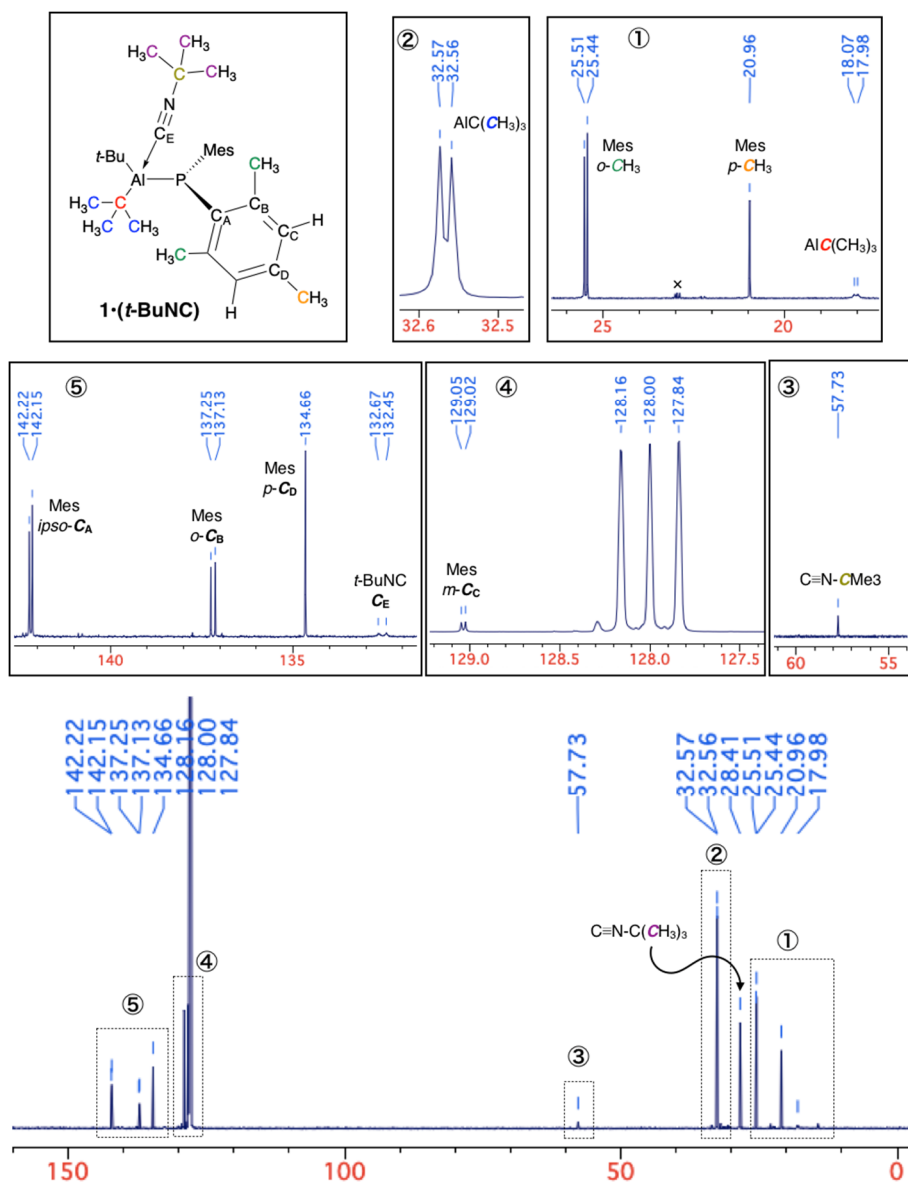

Figure S6.  $^{13}\text{C}\{^1\text{H}\}$  NMR spectrum of  $1\text{-(t-BuNC)}$  (151 MHz,  $\text{C}_6\text{D}_6$ , 298 K).

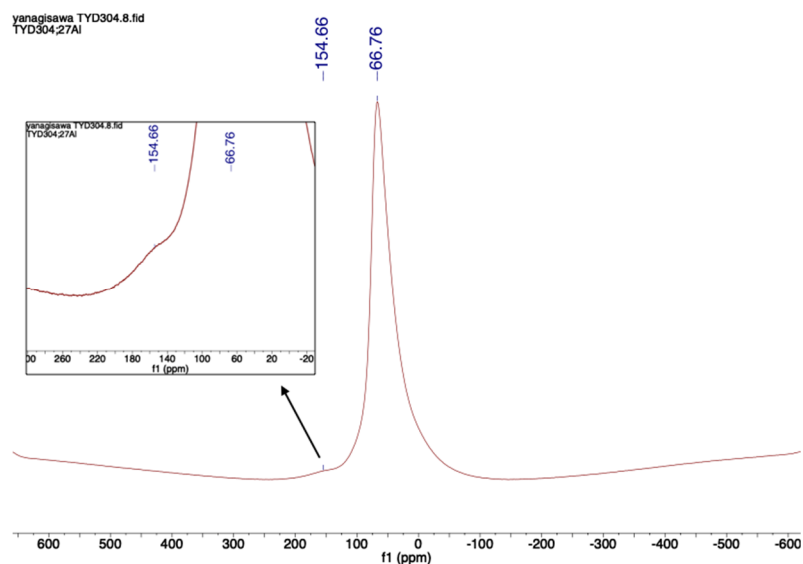

Figure S7.  $^{27}\text{Al}\{^1\text{H}\}$  NMR spectrum of **1**-(*t*-BuNC) (156 MHz,  $\text{C}_6\text{D}_6$ , 298 K).

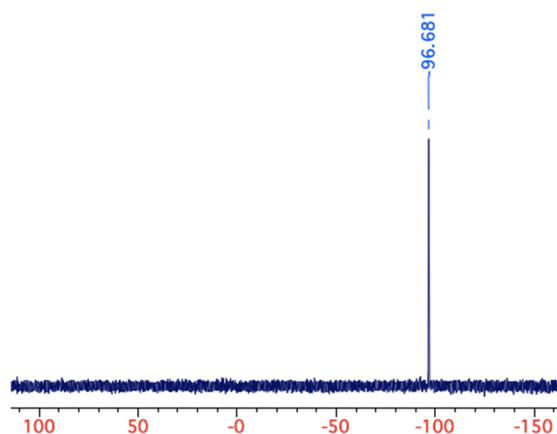

Figure S8.  $^{31}\text{P}\{^1\text{H}\}$  NMR spectrum of **1**-(*t*-BuNC) (242 MHz,  $\text{C}_6\text{D}_6$ , 298 K).

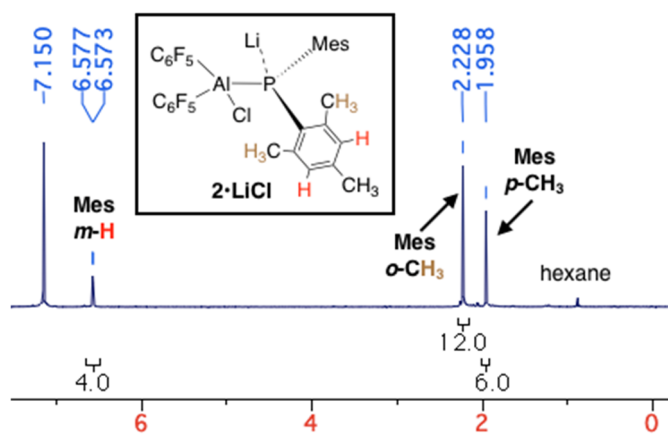

Figure S9.  $^1\text{H}$  NMR spectrum of **2**·LiCl (600 MHz,  $\text{C}_6\text{D}_6$ , 298 K).

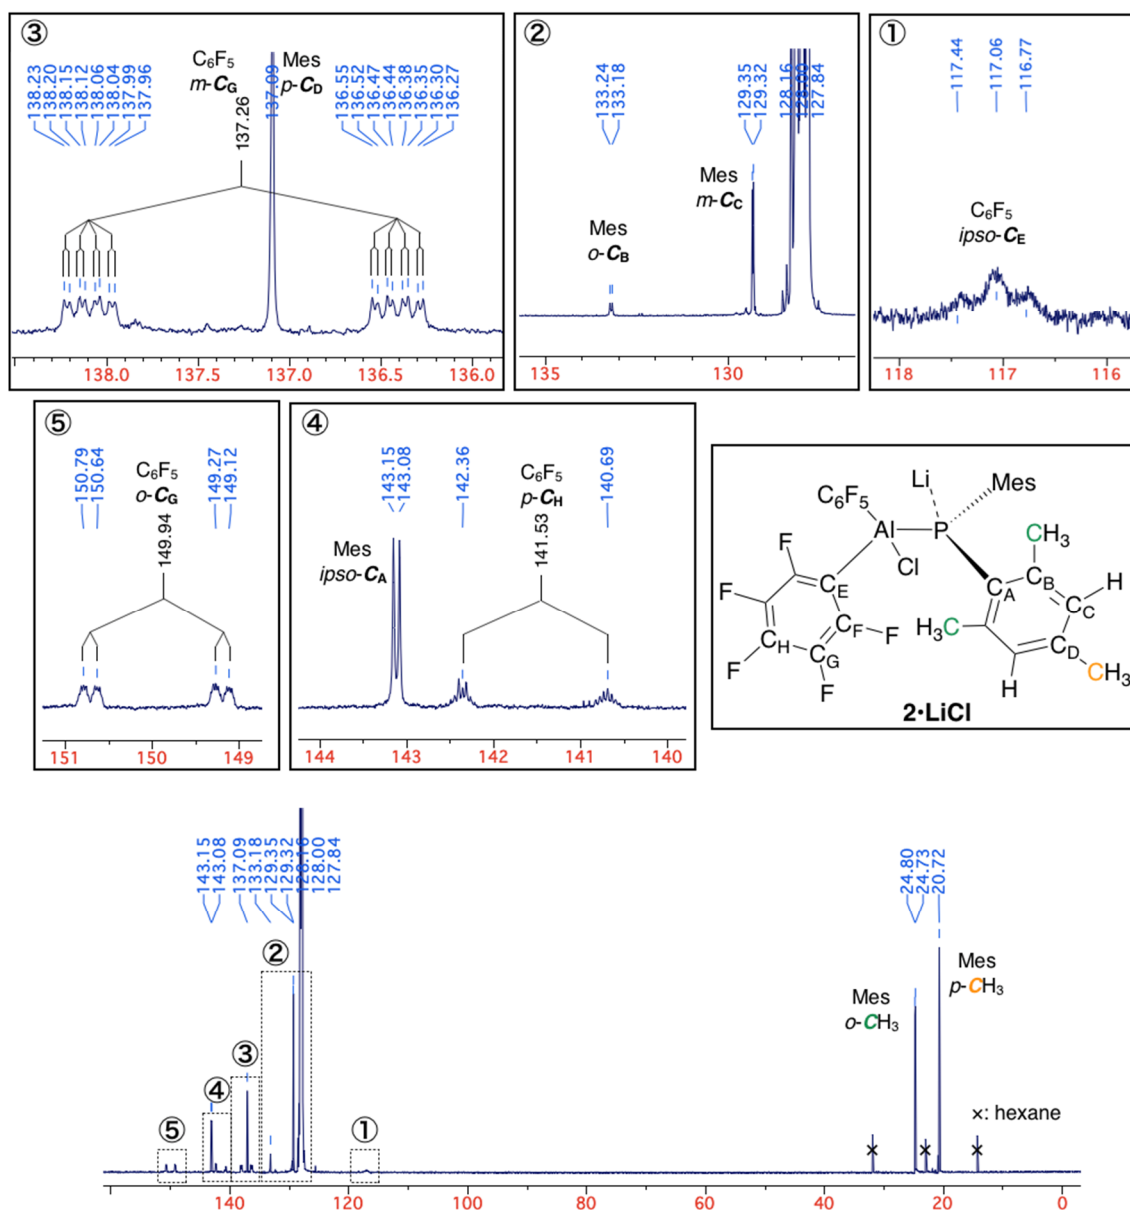

Figure S10.  $^{13}\text{C}\{^1\text{H}\}$  NMR spectrum of **2-LiCl** (151 MHz,  $\text{C}_6\text{D}_6$ , 298 K).

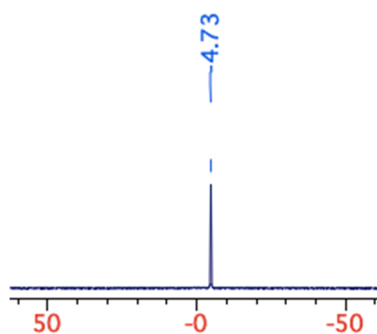

Figure S11.  $^7\text{Li}\{^1\text{H}\}$  NMR spectrum of **2-LiCl** (233 MHz,  $\text{C}_6\text{D}_6$ , 298 K).

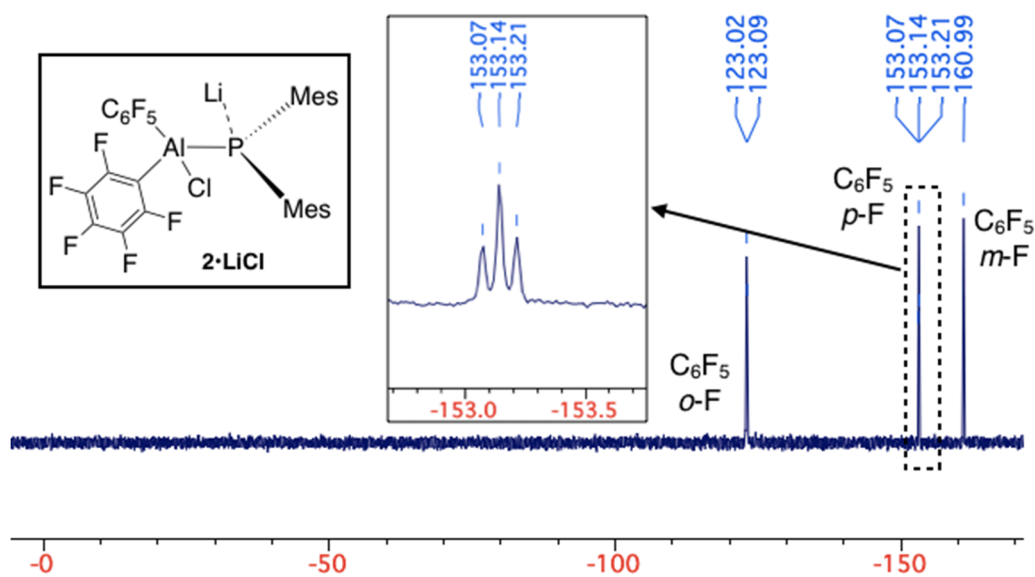

Figure S12.  $^{19}\text{F}$  NMR spectrum of  $2 \cdot \text{LiCl}$  (282 MHz,  $\text{C}_6\text{D}_6$ , 298 K).

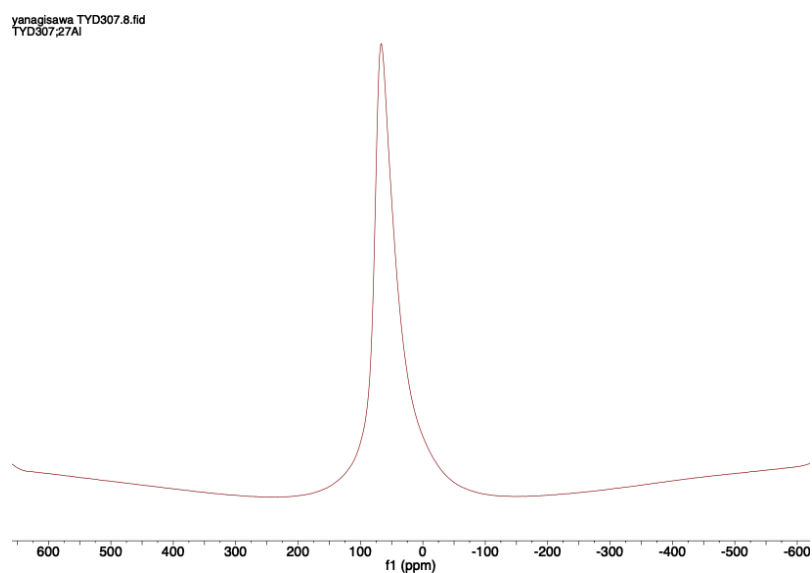

Figure S13.  $^{27}\text{Al}\{^1\text{H}\}$  NMR spectrum of  $2 \cdot \text{LiCl}$  (156 MHz,  $\text{C}_6\text{D}_6$ , 298 K).

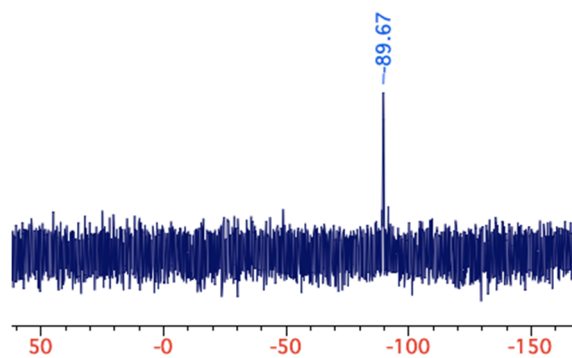

Figure S14.  $^{31}\text{P}\{^1\text{H}\}$  NMR spectrum of  $2 \cdot \text{LiCl}$  (121 MHz,  $\text{C}_6\text{D}_6$ , 298 K).

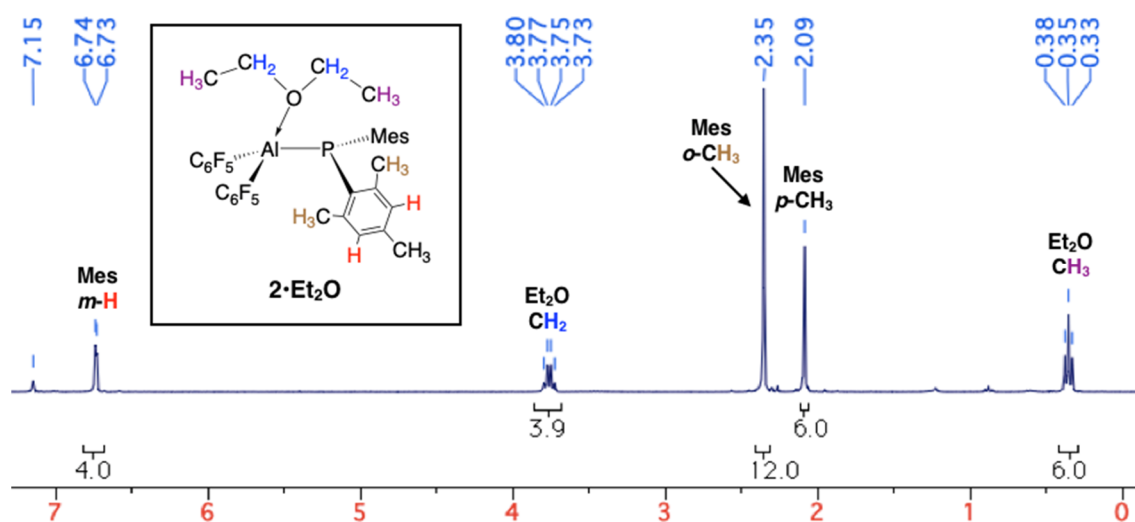Figure S15.  $^1\text{H}$  NMR spectrum of  $2\cdot\text{Et}_2\text{O}$  (300 MHz,  $\text{C}_6\text{D}_6$ , 298 K).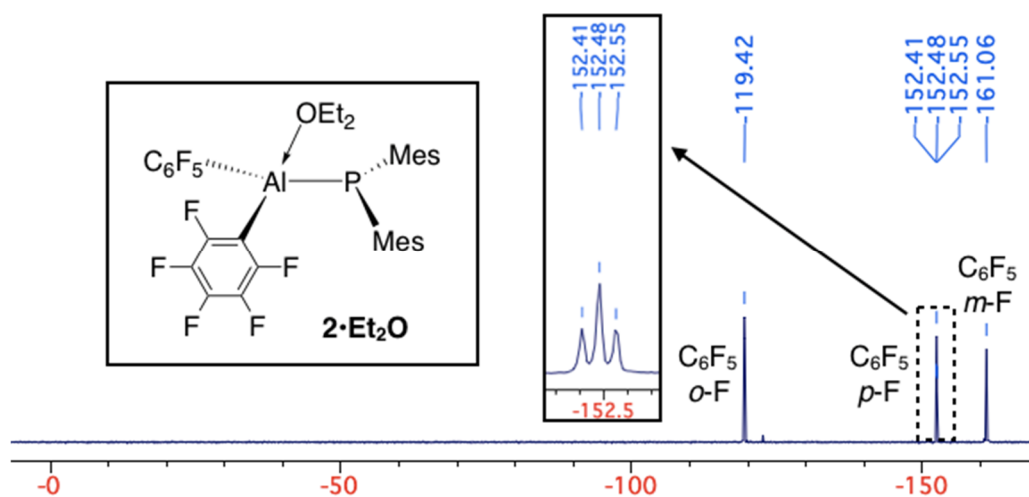Figure S16.  $^{19}\text{F}$  NMR spectrum of  $2\cdot\text{Et}_2\text{O}$  (282 MHz,  $\text{C}_6\text{D}_6$ , 298 K).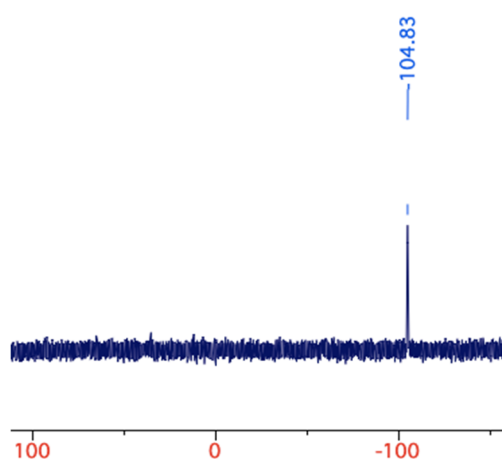Figure S17.  $^{31}\text{P}\{^1\text{H}\}$  NMR spectrum of  $2\cdot\text{Et}_2\text{O}$  (121 MHz,  $\text{C}_6\text{D}_6$ , 298 K).

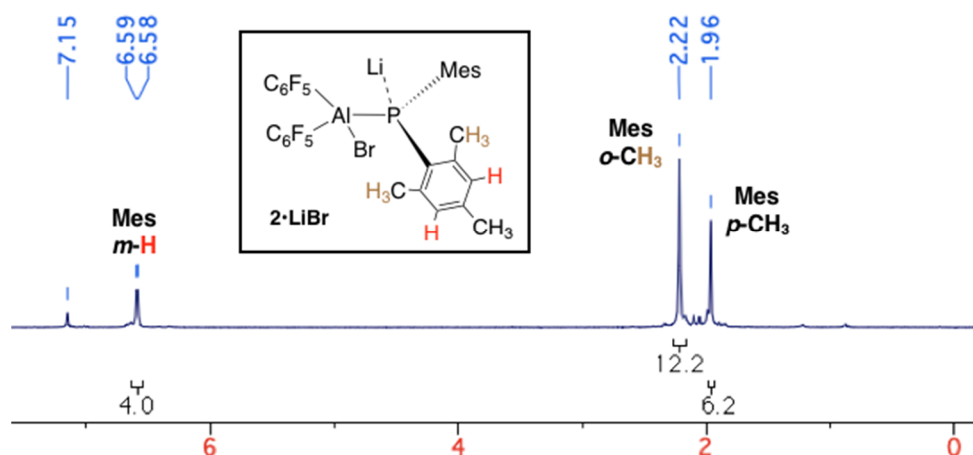

**Figure S18.**  $^1\text{H}$  NMR spectrum of a crude material  $2\cdot\text{LiBr}$  (300 MHz,  $\text{C}_6\text{D}_6$ , 298 K).

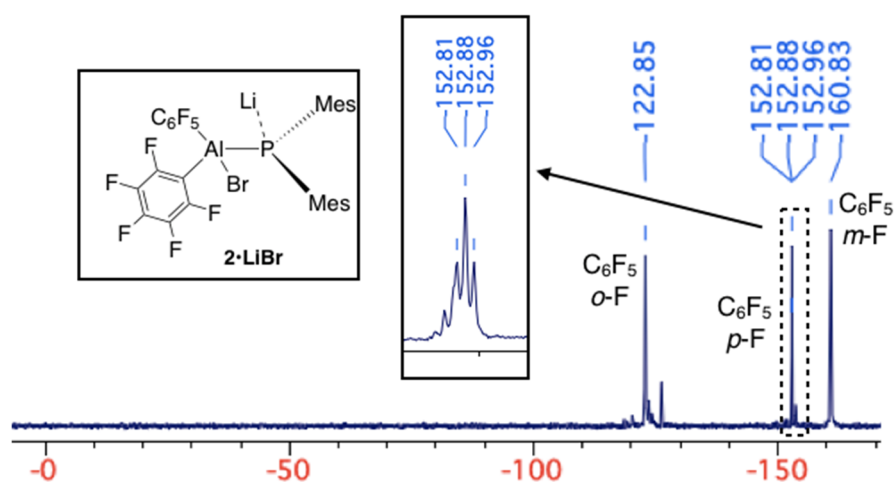

**Figure S19.**  $^{19}\text{F}$  NMR spectrum of a crude material  $2\cdot\text{LiBr}$  (282 MHz,  $\text{C}_6\text{D}_6$ , 298 K).

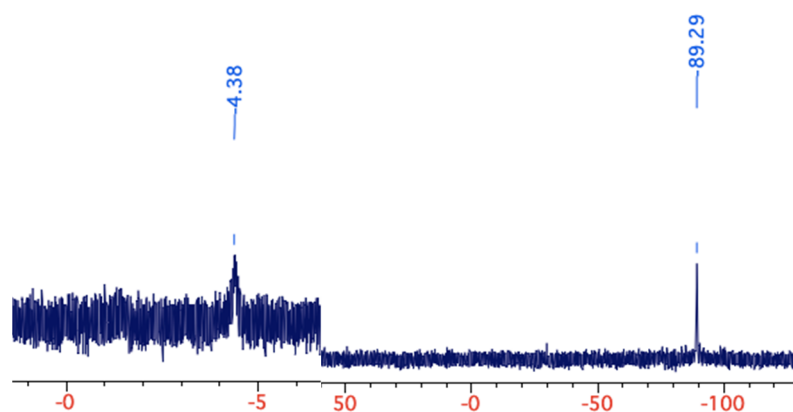

**Figure S20.**  $^7\text{Li}\{^1\text{H}\}$  (left, 117 MHz) and  $^{31}\text{P}\{^1\text{H}\}$  (right, 121 MHz) NMR spectrum of a crude material  $2\cdot\text{LiBr}$  ( $\text{C}_6\text{D}_6$ , 298 K).

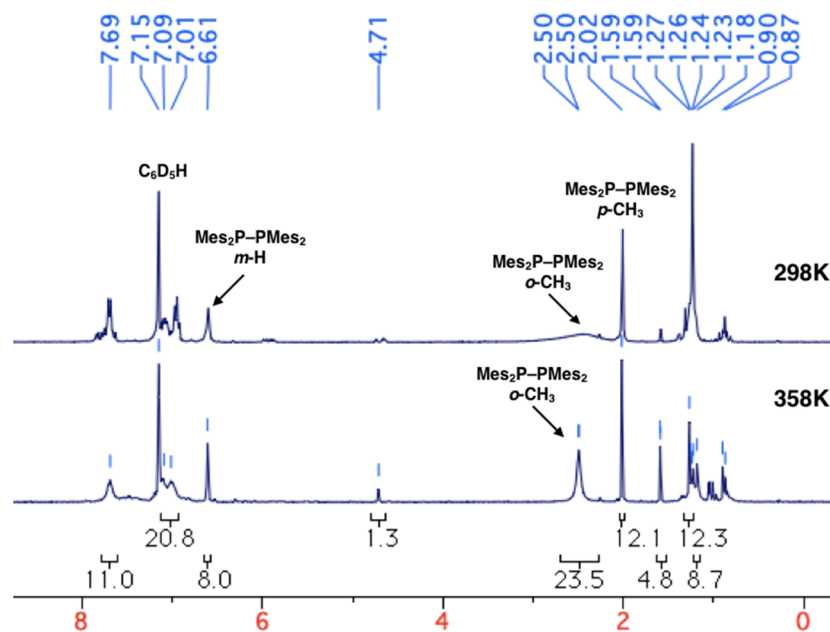

**Figure S21.**  $^1\text{H}$  NMR spectrum of the reaction mixture of **1** and benzophenone (300 MHz,  $\text{C}_6\text{D}_6$ , 298 and 358 K). Due to the broadening of *o*-CH<sub>3</sub> parts in Mes groups,  $^1\text{H}$  NMR spectrum was also recorded at elevated temperature.

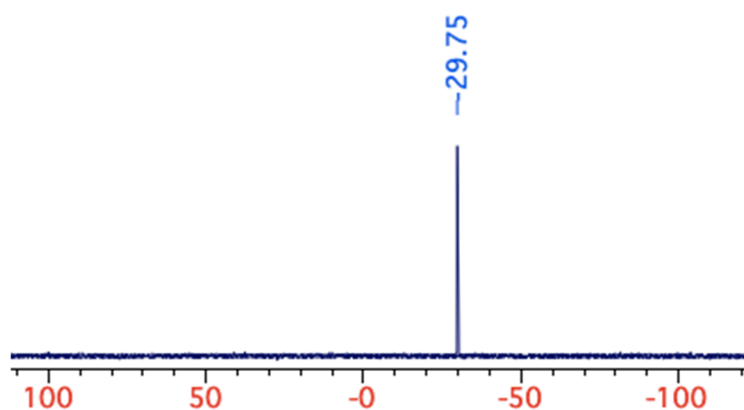

**Figure S22.**  $^{31}\text{P}\{^1\text{H}\}$  NMR spectrum of the reaction mixture of **1** with benzophenone (121 MHz,  $\text{C}_6\text{D}_6$ , 298 K).

## 2. X-Ray Crystallographic Analysis

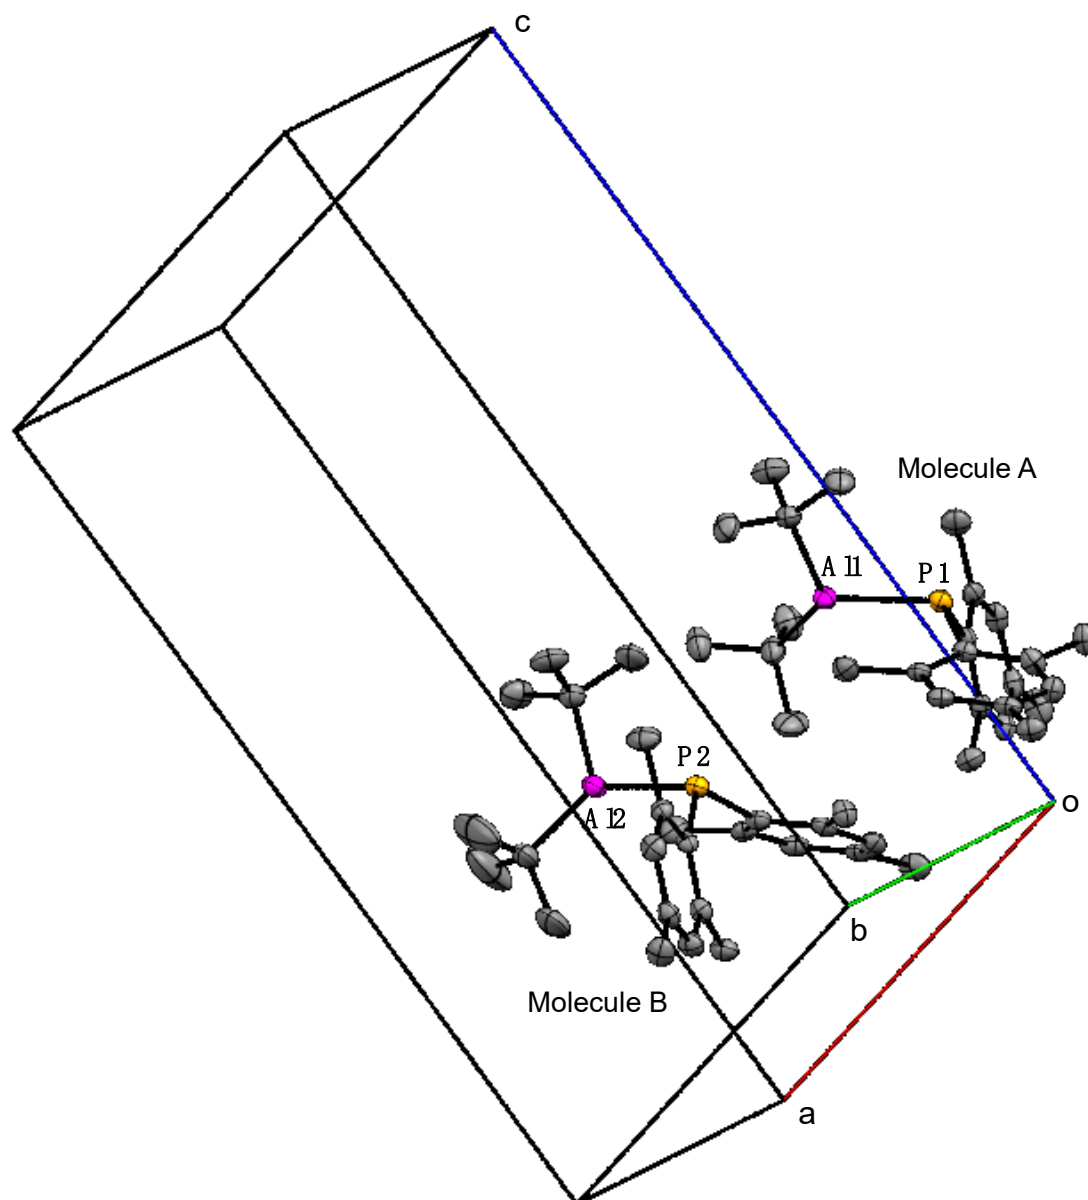

**Figure S23.** Molecular structure of **1** (right Molecule A, left: Molecule B) at 50% probability. Two crystallographically independent molecules were found in the unit cell. Hydrogen atoms, solvent molecule and the disorder part of a *t*-Bu group in the Molecule B are omitted for clarity.

Table S1. Crystallographic data for 1, 1-(*t*-BuNC), 2-Et<sub>2</sub>O, and 2-LiCl.

|                                                              | 1                                                              | 1-( <i>t</i> -BuNC)                      | 2-Et <sub>2</sub> O                                         | 2-LiCl                                                    |
|--------------------------------------------------------------|----------------------------------------------------------------|------------------------------------------|-------------------------------------------------------------|-----------------------------------------------------------|
| Empirical formula                                            | C <sub>55</sub> H <sub>87</sub> Al <sub>2</sub> P <sub>2</sub> | C <sub>31</sub> H <sub>49</sub> AlNP     | C <sub>34</sub> H <sub>32</sub> AlF <sub>10</sub> OP        | C <sub>40.5</sub> H <sub>34</sub> AlClF <sub>10</sub> LiP |
| Formula weight                                               | 864.14                                                         | 493.66                                   | 704.54                                                      | 811.01                                                    |
| Temperature (K)                                              | 103(2)                                                         | 103(2)                                   | 103(2)                                                      | 103(2)                                                    |
| Crystal system                                               | Triclinic                                                      | Monoclinic                               | Orthorhombic                                                | Monoclinic                                                |
| Crystal size (mm)                                            | 0.100 × 0.080 × 0.050                                          | 0.230 × 0.160 × 0.080                    | 0.120 × 0.100 × 0.100                                       | 0.120 × 0.100 × 0.100                                     |
| Space group                                                  | <i>P</i> -1 (#2)                                               | <i>P</i> 2 <sub>1</sub> / <i>c</i> (#14) | <i>P</i> 2 <sub>1</sub> 2 <sub>1</sub> 2 <sub>1</sub> (#19) | <i>P</i> 2 <sub>1</sub> / <i>c</i> (#14)                  |
| <i>a</i> (Å)                                                 | 8.4522(1)                                                      | 19.9406(6)                               | 12.6870(4)                                                  | 27.6951(9)                                                |
| <i>b</i> (Å)                                                 | 15.9446(3)                                                     | 8.6565(2)                                | 15.9515(5)                                                  | 9.7813(3)                                                 |
| <i>c</i> (Å)                                                 | 20.8805(4)                                                     | 20.1247(6)                               | 16.0665(5)                                                  | 14.2023(5)                                                |
| $\alpha$ (°)                                                 | 71.211(2)                                                      | 90                                       | 90                                                          | 90                                                        |
| $\beta$ (°)                                                  | 85.691(2)                                                      | 116.119(4)                               | 90                                                          | 103.951(3)                                                |
| $\gamma$ (°)                                                 | 89.948(2)                                                      | 90                                       | 90                                                          | 90                                                        |
| <i>V</i> (Å <sup>3</sup> )                                   | 2655.71(8)                                                     | 3119.01(18)                              | 3251.48(18)                                                 | 3733.8(2)                                                 |
| <i>Z</i>                                                     | 2                                                              | 4                                        | 4                                                           | 4                                                         |
| <i>D</i> <sub>calcd.</sub> (g·cm <sup>-3</sup> )             | 1.081                                                          | 1.051                                    | 1.439                                                       | 1.443                                                     |
| $\mu$ (mm <sup>-1</sup> )                                    | 0.148                                                          | 0.134                                    | 0.197                                                       | 0.249                                                     |
| <i>F</i> (000)                                               | 946                                                            | 1080                                     | 1448                                                        | 1660                                                      |
| $\theta$ range (°)                                           | 1.947 to 25.250                                                | 2.029 to 25.245                          | 1.799 to 25.248                                             | 2.216 to 25.250                                           |
| Reflections collected                                        | 45144                                                          | 34738                                    | 34942                                                       | 41517                                                     |
| Independent reflections                                      | 9579 [ <i>R</i> <sub>int</sub> = 0.0475]                       | 5641 [ <i>R</i> <sub>int</sub> = 0.0272] | 5889 [ <i>R</i> <sub>int</sub> = 0.0560]                    | 6745 [ <i>R</i> <sub>int</sub> = 0.0752]                  |
| Completeness to $\theta_{\max}$                              | 99.6%                                                          | 99.8%                                    | 100%                                                        | 99.8%                                                     |
| Data / restraints / parameters                               | 9579 / 6 / 573                                                 | 1850 / 0 / 322                           | 5889 / 0 / 432                                              | 6745 / 0 / 531                                            |
| Goodness of fit                                              | 1.144                                                          | 1.035                                    | 1.048                                                       | 1.050                                                     |
| <i>R</i> <sub>1</sub> [ <i>I</i> > 2 $\sigma$ ( <i>I</i> )]  | 0.0562                                                         | 0.0381                                   | 0.0336                                                      | 0.0841                                                    |
| <i>wR</i> <sub>2</sub> [ <i>I</i> > 2 $\sigma$ ( <i>I</i> )] | 0.1261                                                         | 0.0979                                   | 0.0678                                                      | 0.2126                                                    |
| <i>R</i> <sub>1</sub> (all data)                             | 0.0795                                                         | 0.0439                                   | 0.0437                                                      | 0.0947                                                    |
| <i>wR</i> <sub>2</sub> (all data)                            | 0.1338                                                         | 0.1028                                   | 0.0714                                                      | 0.2188                                                    |
| Largest diff. peak (e <sup>-</sup> ·Å)                       | 0.510                                                          | 0.720                                    | 0.253                                                       | 1.139                                                     |
| Largest diff. hole (e <sup>-</sup> ·Å)                       | -0.469                                                         | -0.236                                   | -0.174                                                      | -0.441                                                    |
| CCDC number                                                  | 1959322                                                        | 1959323                                  | 1959324                                                     | 1959325                                                   |

### 3. Computational Studies

*Coordinates (xyz) for the Calculated Structures*

**Table S2.**  $\lambda^3, \lambda^3$ -phosphanylalumane (**2**).

| 2      −1718544.8416 kcal·mol <sup>−1</sup> |         |         |         |      |         |         |         |      |         |         |         |
|---------------------------------------------|---------|---------|---------|------|---------|---------|---------|------|---------|---------|---------|
| Atom                                        | x       | y       | z       | Atom | x       | y       | z       | Atom | x       | y       | z       |
| P                                           | −0.1636 | 1.4709  | −1.232  | C    | 4.6865  | −2.0955 | 0.2846  | C    | −1.1061 | −0.2113 | −3.6199 |
| Al                                          | 0.8639  | −0.1832 | 0.0322  | C    | 5.5606  | −1.1456 | −0.2416 | H    | −0.8341 | 0.7986  | −3.9415 |
| F                                           | −0.2827 | −2.4966 | −1.4117 | C    | −2.6289 | 1.3599  | 1.0509  | H    | −1.5625 | −0.7338 | −4.4667 |
| F                                           | 3.2857  | 1.5643  | −0.9679 | H    | −2.7368 | 2.4348  | 0.8785  | H    | −0.1711 | −0.7343 | −3.384  |
| F                                           | 2.5261  | −2.74   | 0.8887  | H    | −1.6556 | 1.2159  | 1.5277  | C    | −1.9756 | 3.8229  | −2.0466 |
| F                                           | −0.5921 | −0.6145 | 2.9085  | H    | −3.3918 | 1.0543  | 1.7735  | H    | −2.7595 | 3.0622  | −1.9511 |
| F                                           | 5.9201  | 1.0032  | −1.1636 | C    | −0.7457 | 5.4554  | 1.1683  | H    | −1.3094 | 3.488   | −2.851  |
| F                                           | 6.8632  | −1.4179 | −0.3344 | C    | 3.3305  | −1.7891 | 0.374   | H    | −2.4495 | 4.7571  | −2.3627 |
| F                                           | 5.1581  | −3.2794 | 0.6923  | C    | −2.1276 | −2.2784 | 2.2625  | C    | −2.6166 | −3.1436 | 1.2839  |
| F                                           | −2.4911 | −4.036  | −0.9022 | C    | −1.2218 | 4.0126  | −0.7504 | C    | −4.0805 | −1.1188 | −1.4332 |
| F                                           | −2.7519 | −2.1864 | 3.4439  | C    | −1.398  | 5.2039  | −0.0402 | C    | −3.1672 | −1.0408 | −2.4825 |
| F                                           | −3.7181 | −3.8669 | 1.5178  | H    | −2.0659 | 5.9602  | −0.4482 | H    | −3.311  | −1.6701 | −3.3581 |
| C                                           | −0.8684 | −2.4442 | −0.1859 | C    | −0.3693 | 3.009   | −0.2244 | C    | −0.9282 | 6.7658  | 1.8956  |
| C                                           | 5.0766  | 0.0919  | −0.6653 | C    | 0.1049  | 4.4663  | 1.6643  | H    | −0.2221 | 7.5226  | 1.5285  |
| C                                           | −0.36   | −1.5506 | 0.7465  | H    | 0.6242  | 4.6394  | 2.6046  | H    | −0.7569 | 6.6554  | 2.9718  |
| C                                           | 3.7135  | 0.3484  | −0.5582 | C    | 0.3068  | 3.2564  | 0.993   | H    | −1.9373 | 7.167   | 1.7516  |
| C                                           | −1.8181 | 0.5975  | −1.2839 | C    | −2.0517 | −0.1954 | −2.4366 | C    | −5.2079 | −2.1217 | −1.4394 |
| C                                           | 2.7953  | −0.567  | −0.0403 | C    | 1.2464  | 2.2544  | 1.6206  | H    | −6.1163 | −1.7127 | −0.9834 |
| C                                           | −2.7647 | 0.559   | −0.2243 | H    | 0.7314  | 1.3013  | 1.8561  | H    | −4.9238 | −3.012  | −0.8635 |
| C                                           | −1.0103 | −1.5011 | 1.9697  | H    | 1.6307  | 2.6088  | 2.5823  | H    | −5.4514 | −2.4512 | −2.4546 |
| C                                           | −3.873  | −0.2861 | −0.3314 | H    | 2.1146  | 2.0566  | 0.9846  |      |         |         |         |
| H                                           | −4.5812 | −0.3218 | 0.4943  | C    | −1.9838 | −3.2369 | 0.0455  |      |         |         |         |

Table S3. Anion part of 2-LiCl (2Cl<sup>-</sup>).

| 2Cl <sup>-</sup> -2007201.5083 kcal·mol <sup>-1</sup> |         |         |         |      |         |         |         |      |         |         |         |
|-------------------------------------------------------|---------|---------|---------|------|---------|---------|---------|------|---------|---------|---------|
| Atom                                                  | x       | y       | z       | Atom | x       | y       | z       | Atom | x       | y       | z       |
| Al                                                    | 0.6369  | 0.3775  | 0.7642  | H    | -3.9888 | -2.4646 | 1.4546  | C    | 2.7025  | 2.1138  | -0.7166 |
| P                                                     | -1.0866 | 1.0098  | -0.7986 | C    | -3.1565 | -3.191  | -0.3842 | F    | 3.4368  | -0.3601 | 1.7918  |
| Cl                                                    | 0.4004  | 0.7893  | 2.9106  | C    | -2.3946 | -2.8344 | -1.4978 | F    | 5.932   | 0.461   | 1.1993  |
| C                                                     | -2.2711 | 2.3774  | -0.3755 | H    | -2.2038 | -3.5795 | -2.269  | F    | 6.3263  | 2.3998  | -0.6887 |
| C                                                     | -1.8749 | 3.519   | 0.3702  | C    | -1.8462 | -1.5568 | -1.6429 | F    | 4.1836  | 3.5025  | -1.978  |
| C                                                     | -2.7925 | 4.5447  | 0.6185  | C    | -3.1542 | 0.0513  | 1.6013  | F    | 1.6938  | 2.6985  | -1.4082 |
| H                                                     | -2.4652 | 5.402   | 1.2054  | H    | -3.8491 | 0.8348  | 1.2779  | C    | 0.7153  | -1.6304 | 0.4931  |
| C                                                     | -4.1031 | 4.5102  | 0.1425  | H    | -2.2504 | 0.5567  | 1.9514  | C    | -0.0156 | -2.5417 | 1.2536  |
| C                                                     | -4.4606 | 3.4262  | -0.6571 | H    | -3.5982 | -0.4701 | 2.4555  | C    | -0.0923 | -3.9005 | 0.9583  |
| H                                                     | -5.4594 | 3.3955  | -1.0916 | C    | -3.6334 | -4.6104 | -0.1896 | C    | 0.5954  | -4.4008 | -0.1413 |
| C                                                     | -3.576  | 2.3796  | -0.9443 | H    | -3.8011 | -5.117  | -1.1473 | C    | 1.351   | -3.5364 | -0.926  |
| C                                                     | -5.0901 | 5.6038  | 0.4764  | H    | -4.5659 | -4.6497 | 0.3858  | C    | 1.3926  | -2.1866 | -0.5858 |
| H                                                     | -4.5937 | 6.576   | 0.5813  | H    | -2.8813 | -5.1868 | 0.3641  | F    | -0.7433 | -2.1281 | 2.311   |
| H                                                     | -5.6083 | 5.4033  | 1.4252  | C    | -1.0303 | -1.2746 | -2.888  | F    | -0.8526 | -4.7351 | 1.6976  |
| H                                                     | -5.8607 | 5.7007  | -0.2978 | H    | -1.3716 | -0.3648 | -3.3939 | F    | 0.5161  | -5.7076 | -0.4515 |
| C                                                     | -4.0662 | 1.3086  | -1.8948 | H    | -1.1026 | -2.1137 | -3.5899 | F    | 2.0089  | -4.0111 | -2.0019 |
| H                                                     | -4.3473 | 0.3848  | -1.3789 | H    | 0.0298  | -1.1202 | -2.6643 | F    | 2.1019  | -1.387  | -1.4286 |
| H                                                     | -3.2921 | 1.0353  | -2.6206 | C    | 2.4386  | 1.1433  | 0.244   | C    | -0.4714 | 3.6958  | 0.8983  |
| H                                                     | -4.9424 | 1.6657  | -2.4482 | C    | 3.5703  | 0.6134  | 0.8606  | H    | -0.3351 | 4.7061  | 1.2999  |
| C                                                     | -2.0478 | -0.5828 | -0.6294 | C    | 4.8739  | 1.0096  | 0.5721  | H    | 0.2776  | 3.5498  | 0.1153  |
| C                                                     | -2.8573 | -0.921  | 0.4837  | C    | 5.0792  | 1.9934  | -0.3909 | H    | -0.2517 | 2.9922  | 1.7065  |
| C                                                     | -3.3964 | -2.2103 | 0.5772  | C    | 3.9857  | 2.5534  | -1.0427 |      |         |         |         |
